# Supplementary material
Source: publisher site journal article supplement (https://www.dovepress.com/article/556561)
Supplement: Supplementary file 1 [file 556561_Revised_Supplementary%20Material_1.pdf]

## **Supplementary file 1: In-depth Interview Guide**

*(1) What does pediatric medication safety mean to you?*

*(2) In your view, what strategies help ensure medication safety in pediatric care?*

*(3) What do you believe are the main reasons of pediatric medication errors?*

Key probing questions include: ***communication challenges, availability of pediatric-specific resources, teamwork and collaboration, workload and workflow, physical work environment, training and education needs, use of technology and automation, Omission and commission errors.***

*(4) Can you share a personal experience involving a pediatric medication error?*

*(5) How was the situation managed?*

**-END-**

## **Supplementary file 2 : Steps of data analysis**

Thematic analysis by Braun and Clarke (2006)<sup>19</sup> was employed, utilizing a six-phase approach for thematic analysis. These steps include: reading and re-reading the translated transcripts, generating codes, searching for themes, assessing themes, defining and labelling themes, and finally writing the results.

**Step One** : The researcher read and re-read the translated transcripts to gain familiarity with the entire body of the data corpus and took notes for early impressions. This step was crucial for immersing herself in the data and understanding the depths and breadths of the content.

**Step two** - Generating codes; Data were structured in a meaningful and systematic way by coding, which reduced large amount of data into smaller, meaningful chunks. This was achieved using a pen and highlighter on the hard copy of the transcripts to mark significant sections of the text.

**Step three** - Searching for themes; Important or interesting information about the data and research objectives was captured by examining the codes and fitting them together into broader themes. This involved looking for patterns among the codes and grouping them into overarching themes that accurately reflected the nurses' experiences and perceptions.

**Step four** - assessing themes; The preliminary themes identified were revealed, modified and further developed to ensure they accurately represented the data. This process involved gathering all the data relevant to each theme assessing their coherence and ensuring they made sense in the context of the study. The themes were refined to capture the essence of the participants' experiences and perceptions more precisely.

**Step five** - defining and labelling themes; The final refinement of the themes was carried out with the aim of recognizing the essence of what each theme represented. This involved defining each theme clearly, outlining each significance, and explaining how the subthemes interacted with and related to the main theme. This step ensured that the themes were well defined and captured the core aspects of the participants' experiences and perceptions.

**Step Six** - writing the results; The final phase involved compiling the research findings, relating the analysis back to the research questions and literature into a coherent narrative. This included presenting the themes and subthemes in a structured manner, supported by relevant quotes from participants. The write-up aimed to provide a comprehensive and insightful account of the nurses' experiences and perceptions ensuring that, the findings were clear, meaningful and accurately reflected the data collected.
